# Supplementary material for: Differences in Longevity and Temperature-Driven Extrinsic Incubation Period Correlate with Varying Dengue Risk in the Arizona–Sonora Desert Region
Source: MDPI journal article supplement (doi:10.3390/v15040851), 2023-03-26
Supplement: s1 [file s1]

Table S1. Comparison of estimated age of parous mosquitoes, estimated extrinsic Incubation period + average days post eclosion, the probability that a given mosquito will exceed the EIP, and the number of potential vectors per trap per day, and the incident rate ratio of potential vectors per day. Nogales, SN is used as standard for all statistical comparisons.

| Year | Month        | City        | Total N | Age of Parous Mosquitoes, in days, median (Q1, Q3) | P-value (age) <sup>a</sup> | EIP + 2.63 days, median (Q1, Q3) | P-value (EIP) <sup>b</sup> | Prob. Exceeds EIP, median (Q1, Q3) | No. Potential Vectors/ trap/day | IRR (95% CI) <sup>c</sup> |
|------|--------------|-------------|---------|----------------------------------------------------|----------------------------|----------------------------------|----------------------------|------------------------------------|---------------------------------|---------------------------|
| 2013 | Jul          | Nogales, SN | 96      | 4.1 (3.4, 6.5)                                     | Ref.                       | 12.9 (12.7, 13.1)                | Ref.                       | 0.00 (0.00, 0.06)                  | 0.16                            | Ref.                      |
|      |              | Tucson*     | -       | -                                                  | -                          | -                                | -                          | -                                  | -                               | -                         |
|      |              | Nogales, AZ | 10      | 20.2 (19.8, 21.8)                                  | < 0.01                     | 13.6 (13.6, 13.6)                | <0.001                     | 0.85 (0.82, 0.86)                  | 0.21                            | 1.3 (0.3, 6.2)            |
|      |              | Hermosillo  | 73      | 9.0 (4.8, 15.3)                                    | < 0.001                    | 8.8 (8.5, 9.1)                   | <0.001                     | 0.50 (0.08, 0.88)                  | 0.42                            | 2.1 (0.8, 5.8)            |
| 2013 | Aug.         | Nogales, SN | 143     | 5.2 (4.0, 8.8)                                     | Ref.                       | 15.5 (14.0, 16.3)                | Ref.                       | 0.02 (0.00, 0.21)                  | 0.22                            | Ref.                      |
|      |              | Tucson      | 338     | 8.4 (5.4, 14.6)                                    | < 0.001                    | 10.7 (10.3, 10.9)                | <0.001                     | 0.33 (0.07, 0.80)                  | 1.21                            | <b>5.2 (2.5, 11.2)</b>    |
|      |              | Nogales, AZ | 70      | 5.3 (3.8, 8.2)                                     | 0.83                       | 12.9 (12.4, 15.9)                | <0.001                     | 0.03 (0.00, 0.18)                  | 0.32                            | 1.3 (0.4, 4.1)            |
|      |              | Hermosillo  | 145     | 7.3 (4.9, 11.7)                                    | <b>0.01</b>                | 9.3 (9.1, 9.4)                   | <0.001                     | 0.30 (0.08, 0.72)                  | 0.52                            | <b>2.2 (1.0, 4.9)</b>     |
| 2013 | Sept/<br>Oct | Nogales, SN | 131     | 6.7 (5.1, 8.9)                                     | Ref.                       | 30.4 (22.6, 41.8)                | Ref.                       | 0.01 (0.00, 0.09)                  | 0.08                            | Ref.                      |
|      |              | Tucson      | 167     | 6.3 (4.6, 13.8)                                    | 0.6                        | 14.3 (11.3, 18.4)                | <0.001                     | 0.09 (0.02, 0.67)                  | 0.55                            | <b>4.7 (1.4, 17.7)</b>    |
|      |              | Nogales, AZ | 102     | 7.2 (4.4, 12.8)                                    | 0.59                       | 21.8 (18.4, 31.0)                | <b>0.01</b>                | 0.02 (0.00, 0.26)                  | 0.56                            | <b>5.3 (1.2, 27.7)</b>    |
|      |              | Hermosillo  | 381     | 6.6 (4.1, 12.7)                                    | 0.84                       | 10.0 (9.8, 10.2)                 | <0.001                     | 0.15 (0.01, 0.73)                  | 1.30                            | <b>11.0 (3.3,40.5)</b>    |
| 2013 |              | Nogales, SN | 370     | 5.6 (4.0, 8.5)                                     | Ref.                       | 15.6 (13.1, 22.0)                | Ref.                       | 0.01 (0.00, 0.12)                  | 0.2                             | Ref.                      |
|      |              | Tucson      | -       | -                                                  | -                          | -                                | -                          | -                                  | -                               | -                         |
|      |              | Nogales, AZ | 182     | 6.5 (4.2, 12.6)                                    | 0.11                       | 16.8 (12.9, 21.1)                | 0.86                       | 0.03 (0.00, 0.27)                  | 0.4                             | 2.1 (0.9, 4.9)            |
|      |              | Hermosillo  | 599     | 6.9 (4.3, 12.8)                                    | <0.001                     | 9.4 (9.1, 10.0)                  | <0.001                     | 0.24 (0.04, 0.75)                  | 0.8                             | <b>4.0 (2.3, 7.2)</b>     |
| 2014 | Jul          | Nogales, SN | 71      | 8.0 (5.0, 11.9)                                    | Ref.                       | 13.5 (12.1, 14.6)                | Ref.                       | 0.20 (0.01, 0.55)                  | 0.27                            | Ref.                      |
|      |              | Tucson      | 259     | 9.5 (5.8, 13.6)                                    | 0.46                       | 9.4 (9.2, 9.7)                   | <0.001                     | 0.54 (0.12, 0.79)                  | 1                               | <b>3.7 (1.5, 9.5)</b>     |
|      |              | Nogales, AZ | 22      | 3.9 (3.3, 4.4)                                     | <0.001                     | 15.2 (14.5, 16.2)                | <0.01                      | 0.01 (0.00, 0.02)                  | 0.01                            | n/a                       |
|      |              | Hermosillo  | 223     | 7.7 (4.8, 13.8)                                    | 0.68                       | 9.9 (9.7, 10.0)                  | <0.001                     | 0.32 (0.05, 0.78)                  | 0.42                            | 1.5 (0.6, 3.3)            |
| 2014 | Aug.         | Nogales, SN | 213     | 6.7 (4.5, 11.9)                                    | Ref.                       | 16.0 (15.2, 18.1)                | Ref.                       | 0.00 (0.00, 0.08)                  | 0.23                            | Ref.                      |
|      |              | Tucson      | 964     | 10.3 (5.8, 14.3)                                   | <b>0.02</b>                | 9.6 (9.4, 10.1)                  | <0.001                     | 0.57 (0.13, 0.82)                  | 3.74                            | <b>17.2 (8.3, 37.4)</b>   |
|      |              | Nogales, AZ | 56      | 5.7 (4.4, 8.7)                                     | 0.26                       | 15.5 (15.0, 16.8)                | 0.07                       | 0.00 (0.00, 0.02)                  | 0.06                            | 0.2 (0.0, 1.4)            |
|      |              | Hermosillo  | 189     | 8.6 (5.5, 12.3)                                    | 0.12                       | 10.3 (10.2, 10.4)                | <0.001                     | 0.32 (0.07, 0.66)                  | 0.28                            | 1.5 (0.7, 3.3)            |
| 2014 | Sept/<br>Oct | Nogales, SN | 302     | 8.1 (5.8, 11.0)                                    | Ref.                       | 28.8 (25.6, 31.1)                | Ref.                       | 0.01 (0.00, 0.07)                  | 0.25                            | Ref.                      |
|      |              | Tucson      | 442     | 10.3 (4.8, 14.7)                                   | 0.29                       | 13.0 (12.3, 15.4)                | <0.001                     | 0.39 (0.02, 0.69)                  | 1.62                            | <b>6.0 (2.4, 15.6)</b>    |
|      |              | Nogales, AZ | 122     | 5.4 (3.8, 11.6)                                    | <0.01                      | 31.3 (25.1, 35.6)                | <b>0.04</b>                | 0.00 (0.00, 0.06)                  | 0.13                            | 0.6 (0.1, 2.9)            |
|      |              | Hermosillo  | 519     | 6.4 (4.5, 10.7)                                    | <0.01                      | 10.8 (10.5, 11.0)                | <0.001                     | 0.13 (0.02, 0.52)                  | 0.59                            | 2.2 (0.9, 5.1)            |
| 2014 |              | Nogales, SN | 586     | 7.8 (5.3, 11.8)                                    | Ref.                       | 20.2 (15.4, 28.6)                | Ref.                       | 0.01 (0.00, 0.17)                  | 0.25                            | Ref.                      |
|      |              | Tucson      | 1665    | 10.1 (5.6, 14.4)                                   | <0.01                      | 9.9 (9.4, 12.0)                  | <0.001                     | 0.51 (0.11, 0.77)                  | 2.12                            | 8.4 (5.0, 14.3)           |
|      |              | Nogales, AZ | 200     | 5.0 (3.9, 8.6)                                     | <0.001                     | 18.6 (15.4, 31.1)                | 0.55                       | 0.00 (0.00, 0.02)                  | 0.07                            | 0.3 (0.1, 0.8)            |
|      |              | Hermosillo  | 931     | 7.3 (4.7, 12.4)                                    | 0.47                       | 10.3 (10.0, 10.8)                | <0.001                     | 0.21 (0.03, 0.68)                  | 0.43                            | 1.8 (1.1, 2.9)            |

|             |              |             |       |                 |                  |                   |                  |                   |      |                        |
|-------------|--------------|-------------|-------|-----------------|------------------|-------------------|------------------|-------------------|------|------------------------|
| <b>2015</b> | Jul          | Nogales, SN | 66    | 5.4 (4.0, 8.1)  | Ref.             | 11.8 (11.6, 12.3) | Ref.             | 0.02 (0.00, 0.12) | 0.08 | Ref.                   |
|             |              | Tucson      | 314   | 4.7 (3.8, 7.3)  | 0.24             | 9.6 (9.5, 9.7)    | <b>&lt;0.001</b> | 0.05 (0.01, 0.26) | 0.61 | <b>6.8 (2.6, 21.0)</b> |
|             |              | Nogales, AZ | 73    | 4.7 (3.8, 6.7)  | 0.32             | 11.7 (11.5, 12.1) | 0.28             | 0.01 (0.00, 0.05) | 0.09 | 0.5 (0.0, 3.6)         |
|             |              | Santa Ana   | 206   | 4.7 (3.9, 6.3)  | 0.14             | 9.8 (9.6, 9.9)    | <b>&lt;0.001</b> | 0.04 (0.02, 0.18) | 0.31 | <b>3.1 (1.0, 10.6)</b> |
|             |              | Hermosillo  | 220   | 5.6 (3.9, 9.2)  | 0.73             | 9.1 (8.9, 9.2)    | <b>&lt;0.001</b> | 0.15 (0.03, 0.54) | 0.68 | <b>6.7 (2.6, 20.6)</b> |
|             |              | Obregon     | 342   | 5.3 (4.0, 8.0)  | 0.73             | 9.2 (9.1, 9.4)    | <b>&lt;0.001</b> | 0.08 (0.03, 0.36) | 0.97 | <b>9.9 (3.9, 30.4)</b> |
| <b>2015</b> | Aug.         | Nogales, SN | 163   | 6.3 (4.3, 10.6) | Ref.             | 12.7 (12.6, 12.8) | Ref.             | 0.04 (0.00, 0.34) | 0.37 | Ref.                   |
|             |              | Tucson      | 390   | 7.3 (4.9, 11.2) | 0.1              | 9.1 (8.8, 9.3)    | <b>&lt;0.001</b> | 0.36 (0.10, 0.67) | 1.46 | <b>3.8 (2.1, 7.0)</b>  |
|             |              | Nogales, AZ | 85    | 6.1 (4.1, 7.8)  | 0.56             | 12.7 (12.5, 12.8) | 0.43             | 0.04 (0.00, 0.11) | 0.19 | 0.5 (0.1, 1.6)         |
|             |              | Santa Ana   | 201   | 5.2 (4.4, 8.3)  | 0.37             | 10.7 (10.1, 11.1) | <b>&lt;0.001</b> | 0.09 (0.04, 0.36) | 0.54 | 1.4 (0.7, 2.9)         |
|             |              | Hermosillo  | 140   | 7.2 (5.0, 11.9) | 0.14             | 9.9 (9.6, 10.0)   | <b>&lt;0.001</b> | 0.26 (0.06, 0.65) | 0.48 | 1.2 (0.6, 2.3)         |
|             |              | Obregon     | 174   | 5.1 (4.2, 7.6)  | 0.1              | 9.7 (9.5, 9.8)    | <b>&lt;0.001</b> | 0.08 (0.03, 0.30) | 0.43 | 1.1 (0.5, 2.2)         |
| <b>2015</b> | Sept/<br>Oct | Nogales, SN | 188   | 7.1 (4.8, 11.4) | Ref.             | 19.9 (19.4, 20.5) | Ref.             | 0.01 (0.00, 0.10) | 0.16 | Ref.                   |
|             |              | Tucson      | 640   | 5.5 (4.1, 8.4)  | <b>0.01</b>      | 10.8 (10.5, 11.2) | <b>&lt;0.001</b> | 0.08 (0.02, 0.31) | 1.3  | <b>7.4 (3.6, 16.3)</b> |
|             |              | Nogales, AZ | 62    | 4.1 (3.7, 4.5)  | <b>&lt;0.001</b> | 20.7 (20.3, 21.2) | <b>&lt;0.001</b> | 0.00 (0.00, 0.00) | 0.03 | 0.3 (0.0, 1.6)         |
|             |              | Santa Ana   | 93    | 5.6 (3.9, 9.6)  | 0.17             | 12.8 (12.0, 14.7) | <b>&lt;0.001</b> | 0.02 (0.01, 0.34) | 0.2  | 1.1 (0.4, 3.1)         |
|             |              | Hermosillo  | 109   | 4.6 (3.9, 7.4)  | <b>&lt;0.001</b> | 12.0 (11.7, 12.1) | <b>&lt;0.001</b> | 0.03 (0.00, 0.19) | 0.13 | 0.9 (0.3, 2.4)         |
|             |              | Obregon     | 158   | 5.6 (4.4, 10.0) | 0.22             | 10.8 (10.3, 11.1) | <b>&lt;0.001</b> | 0.10 (0.02, 0.45) | 0.43 | <b>2.5 (1.1, 5.9)</b>  |
| <b>2015</b> |              | Nogales, SN | 417   | 6.4 (4.4, 10.5) | Ref.             | 12.9 (12.6, 19.6) | Ref.             | 0.02 (0.00, 0.19) | 0.2  | Ref.                   |
|             |              | Tucson      | 1,344 | 5.9 (4.1, 9.7)  | 0.15             | 9.7 (9.3, 10.6)   | <b>&lt;0.001</b> | 0.13 (0.03, 0.49) | 1.1  | <b>5.1 (3.3, 8.0)</b>  |
|             |              | Nogales, AZ | 220   | 4.6 (3.8, 6.8)  | <b>&lt;0.001</b> | 12.7 (12.1, 20.1) | 0.1              | 0.00 (0.00, 0.05) | 0.1  | 0.4 (0.2, 1.1)         |
|             |              | Santa Ana   | 500   | 5.0 (4.2, 7.7)  | <b>0.01</b>      | 10.1 (9.8, 11.1)  | <b>&lt;0.001</b> | 0.06 (0.02, 0.24) | 0.4  | 1.5 (0.9, 2.6)         |
|             |              | Hermosillo  | 469   | 5.8 (4.2, 9.7)  | <b>0.34</b>      | 9.7 (9.1, 10.7)   | <b>&lt;0.001</b> | 0.13 (0.02, 0.50) | 0.4  | <b>1.9 (1.2, 3.1)</b>  |
|             |              | Obregon     | 674   | 5.3 (4.2, 8.4)  | <b>0.01</b>      | 9.6 (9.3, 9.9)    | <b>&lt;0.001</b> | 0.08 (0.03, 0.36) | 0.6  | <b>2.7 (1.7, 4.3)</b>  |

<sup>a</sup> Logistic regression for binomial proportions <sup>b</sup> Wilcoxon rank sum test with continuity correction <sup>c</sup> Negative binomial regression model stratified by collection cycle and year, relating count of potential vectors per household collection site with log (trap days) as offset and with city as a predictor. \* Ref. indicates the city used for comparisons. July Tucson 2013 missing due to differing RNA extraction methods used for mosquito samples during that collection period.
